# Supplementary material for: Emergence of a dynamic G-tetraplex scaffold: uncovering low salt-induced conformational heterogeneity and the folding mechanism of telomeric DNA
Source: Royal Society of Chemistry journal article supplement (doi:10.1039/d4cp04362f), 2025-01-01
Supplement: d4cp04362f1.pdf [file d4cp04362f1.pdf]

## Supplementary Information for

### **Emergence of Dynamic G-Tetraplex Scaffold: Uncovering Low Salt-Induced Conformational Heterogeneity and Folding Mechanism**

**Manali Basu<sup>1,2,†</sup>, Avijit Mainan<sup>3,†</sup>, Susmita Roy<sup>3,\*</sup>, Padmaja Prasad Mishra<sup>1,2,\*</sup>**

<sup>1</sup>Single Molecule Biophysics Lab, Chemical Sciences Division,  
Saha Institute of Nuclear Physics,  
1/AF Bidhannagar, Kolkata 700064, India

<sup>2</sup>Homi Bhabha National Institute, Mumbai  
E-mail: padmaja.mishra@saha.ac.in

<sup>3</sup>Department of Chemical Sciences  
Indian Institute of Science Education and Research Kolkata,  
Mohanpur Campus, Nadia, West Bengal 741246, India  
Email: susmita.roy@iiserkol.ac.in

<sup>†</sup>This authors have equal contribution

<sup>\*</sup>Corresponding Author

## Details of SBM Potential

$V_{SBM}$  is the all-atom structure-based model potential which ensures the global minimum in the energy landscape for DNA native state.  $V_{SBM}$  can be separated into local and non-local interactions. Restrained harmonic potential for bonds, angles, improper/planner, and proper/flexible dihedral angles are described as local interaction. The non-local term is stated with Lennard Jones' 6-12 potential for close interactions defined as contact-pair present in the native NMR structure whereas the non-native pairs are treated as repulsive.

$$V_{SBM} = V_{SBM,local} + V_{SBM,non-local} \quad (\text{Eq. S1})$$

$$V_{SBM,local} = \sum_i^{bonds} \frac{\beta_r}{2} (r_i - r_i^0)^2 + \sum_i^{angles} \frac{\beta_\theta}{2} (\theta_i - \theta_i^0)^2 + \sum_i^{improper/planner} \frac{\beta_\chi}{2} (\chi_i - \chi_i^0)^2 + \sum_i^{proper\ dihedrals} \beta_\phi F_D(\phi_i - \phi_i^0) \quad (\text{Eq. S2})$$

$$\text{where, } F_D(\phi) = [1 - \cos(\phi)] + \frac{1}{2}[1 - \cos(3\phi)] \quad (\text{Eq. S3})$$

$$V_{SBM,non-local} = \sum_{ij}^{contacts} \beta_C \left( \left( \frac{\sigma_{ij}}{r_{ij}} \right)^{12} - 2 \left( \frac{\sigma_{ij}}{r_{ij}} \right)^6 \right) + \sum_{ij}^{non-contacts} \beta_{NC} \left( \frac{\sigma_{NC}}{r_{ij}} \right)^{12} \quad (\text{Eq. S4})$$

All initial geometric parameters ( $r_i^0, \theta_i^0, \chi_i^0, \phi_i^0, \sigma_{ij}$ ) are received from the NMR structure. Total

contact energy to dihedral energy ratio is conserved as,  $\sum_i^{contacts} \beta_C / \sum_i^{proper\ dihedrals} \beta_\phi = 2$ .

Contact pairs are calculated using the Shadow Algorithm.

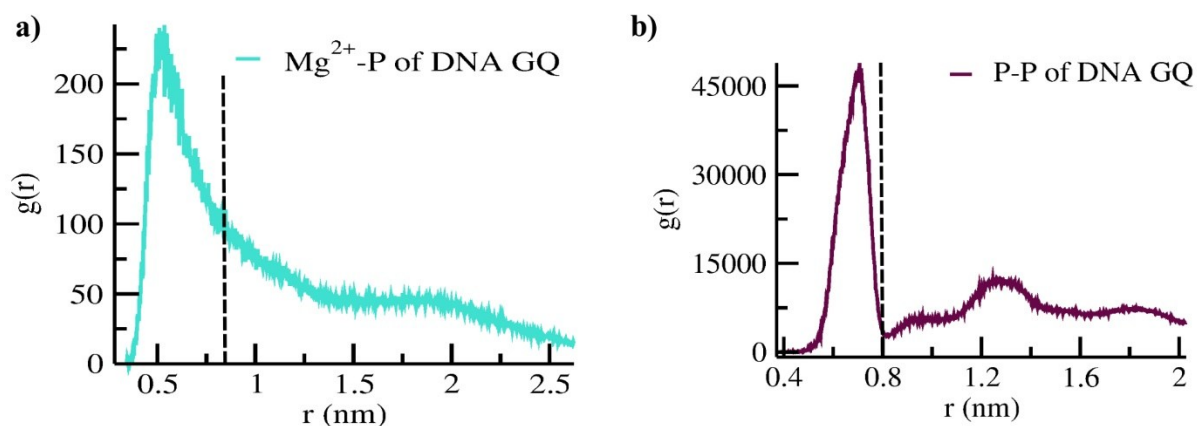

**Figure S1:** Radial distribution function (RDF) plots are used to establish cut-off distances for calculating  $Mg^{2+}$  site visiting frequency and  $Mg^{2+}$ -mediated contact maps. (a) RDF of  $Mg^{2+}$  ions around the phosphate group of DNA, with the boundary indicated for determining the site visiting frequency of  $Mg^{2+}$  ions. (b) RDF between phosphate groups within the DNA, with the highlighted boundary serving as the cut-off distance for calculating the  $Mg^{2+}$ -mediated contact map.

**Table S1:** The cut-off distances for average  $Mg^{2+}$  ion condensation and  $Mg^{2+}$ -mediated contact map.

| Contact Map types                                         | Cut-off $Mg^{2+}$ -P (nm) | Cut-off P-P (nm) |
|-----------------------------------------------------------|---------------------------|------------------|
| Average $Mg^{2+}$ ion condensation ( $\theta_{Mg^{2+}}$ ) | 0.85                      | Not applicable   |
| $Mg^{2+}$ -mediated contact map                           | 0.85                      | 0.8              |

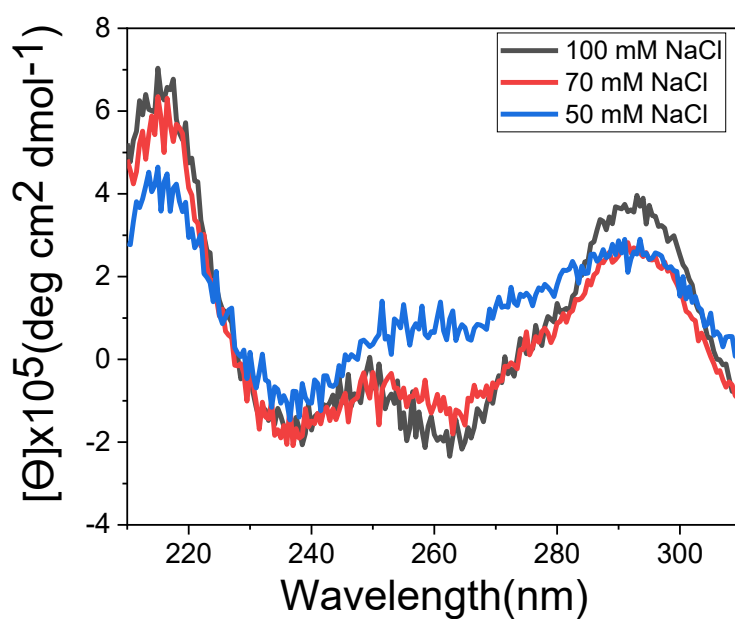

**Figure S2:** CD spectra of telomeric DNA in a 20 mM Tris buffer at various NaCl concentrations at 25 °C.

**Table S2:** Distance between the two ends of the G-quadruplex corresponding to FRET efficiency values at various concentrations of NaCl.

| Conc. Of NaCl | FRET States | Distance between Cy3 and Cy5 (nm) |
|---------------|-------------|-----------------------------------|
| 50 mM NaCl    | 0.19        | 8.13                              |
|               | 0.44        | 7.25                              |
|               | 0.73        | 6.87                              |
| 70 mM NaCl    | 0.24        | 7.88                              |
|               | 0.51        | 7.18                              |
|               | 0.70        | 6.90                              |
| 100 mM NaCl   | 0.27        | 7.74                              |
|               | 0.51        | 7.17                              |
|               | 0.74        | 6.91                              |

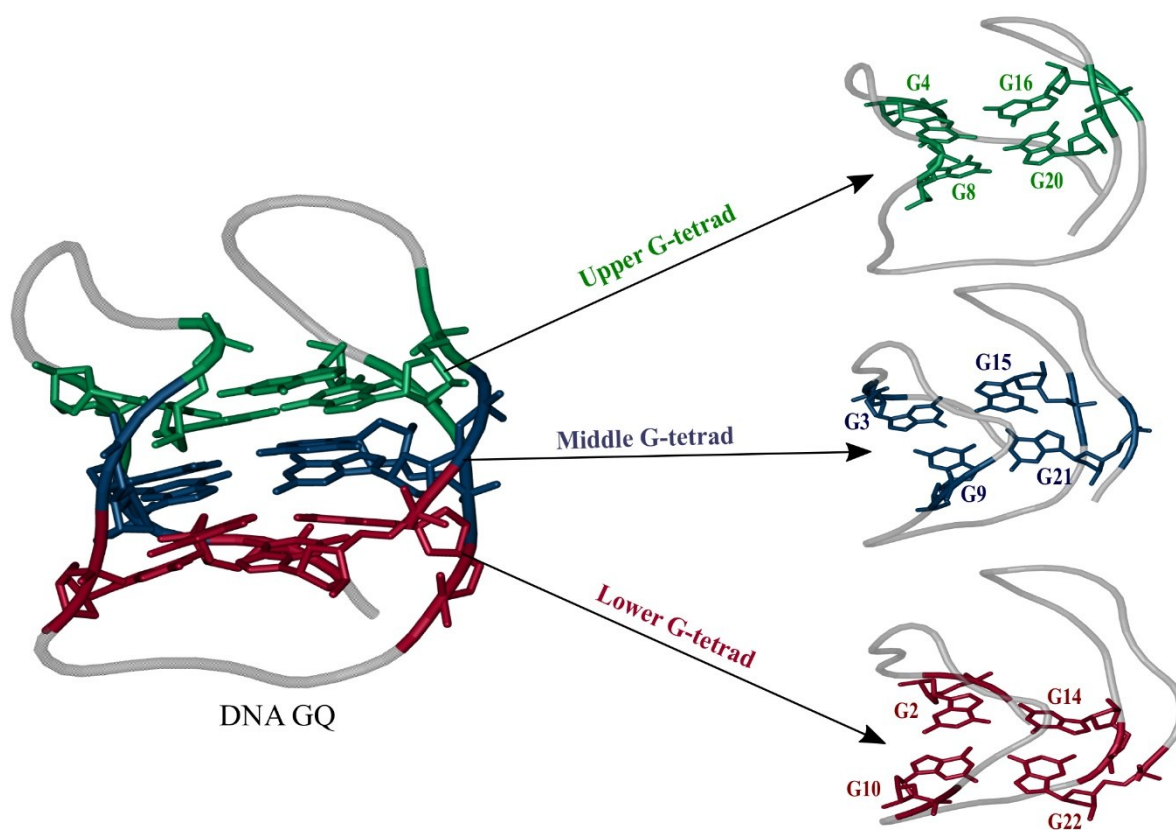

**Figure S3:** DNA G-quadruplex structure featuring three G-tetrad planes: the lower plane includes G2-G10-G14-G22, the middle plane consists of G3-G19-G15-G21 and the upper plane is composed of G4-G8-G16-G20.

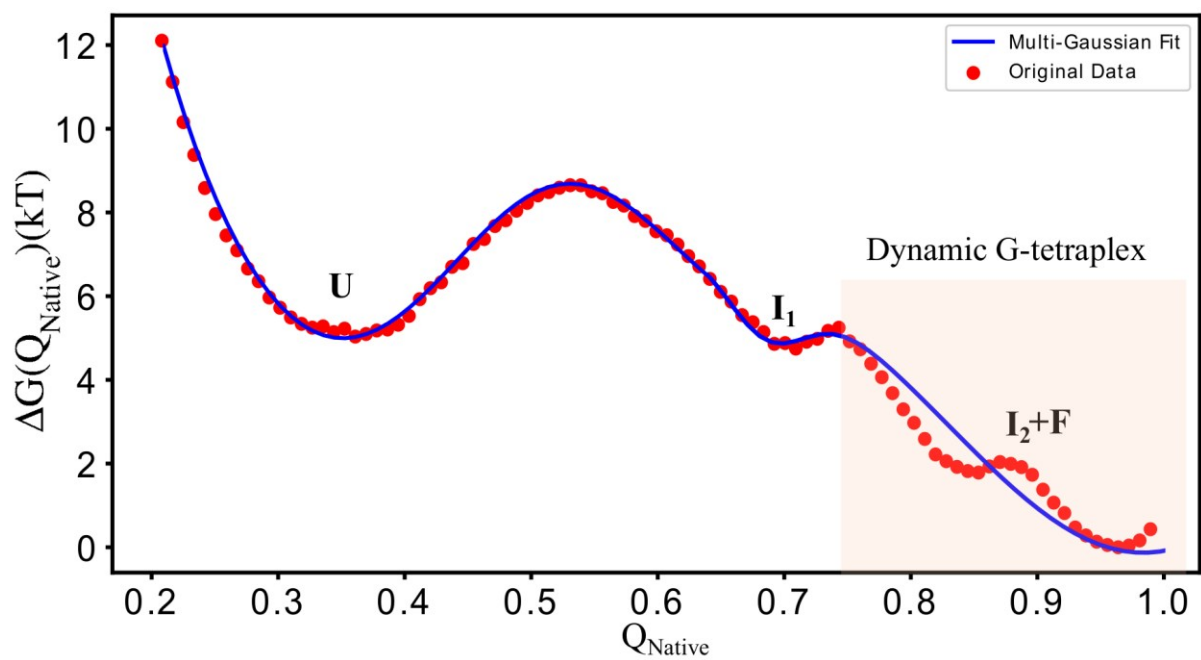

**Figure S4:** Transition from a four-state to a three-state model of free energy profile, where states I<sub>2</sub> and F merge into a dynamic G-tetraplex state.

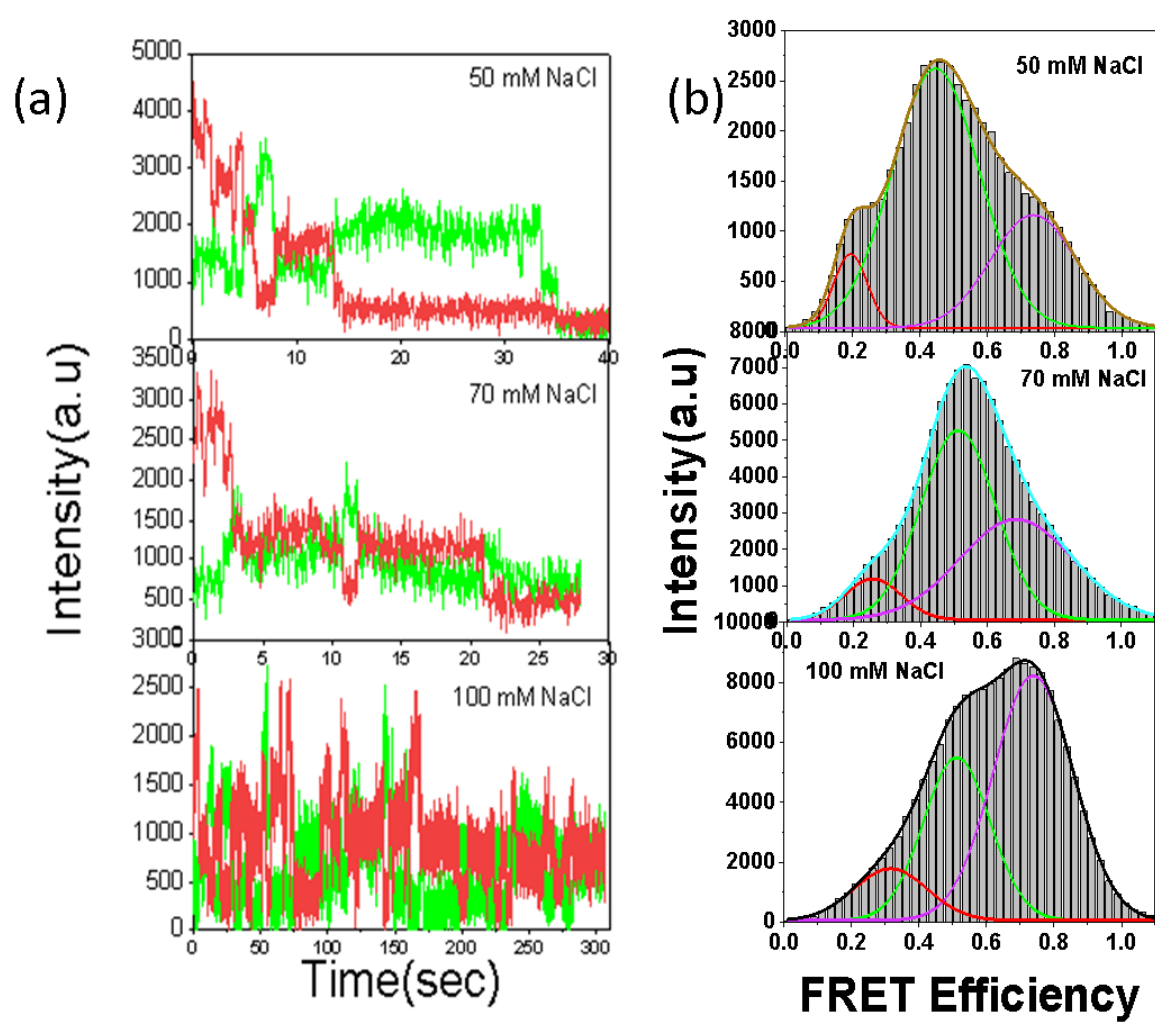

**Figure S5:** Representative single-molecule FRET traces and unnormalized histograms at various concentrations of NaCl

**Table S3:** Comparison of the area under the curve from single-molecule FRET and atomistic STEM simulation results show the normalized population of the dynamic G-tetraplex state at different NaCl concentrations.

| Concentration of NaCl | smFRET Peak Positions (High) | Area under the Curve (smFRET) | Area under the Curve (STEM Simulation) |
|-----------------------|------------------------------|-------------------------------|----------------------------------------|
| 50 mM                 | 0.75                         | 13.25                         | 0.807                                  |
| 70 mM                 | 0.70                         | 16.48                         | 0.878                                  |
| 100 mM                | 0.73                         | 27.52                         | 0.992                                  |

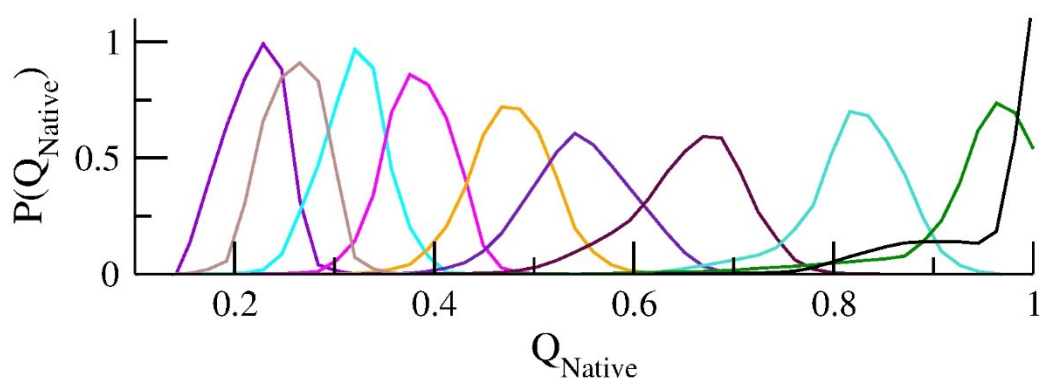

**Figure S6:** The overlap of conformational space in the neighboring windows as a histogram plot. 10 windows are used where the fraction of global native contacts ( $Q_{\text{Native}}$ ) varies from 0.14 to 1 and is represented as unfolded (U) to folded (F) state respectively. The probability distribution of  $Q_{\text{Native}}$  shows an ideal overlap of the configuration.
